# Supplementary material for: Acoustic tweezers based on circular, slanted-finger interdigital transducers for dynamic manipulation of micro-objects
Source: Royal Society of Chemistry journal article supplement (doi:10.1039/c9lc01124b), 2020-01-01
Supplement: c9lc01124b5.pdf [file c9lc01124b5.pdf]

## Supplementary Information

### **Acoustic tweezers based on circular, slanted-finger interdigital transducers for dynamic manipulation of micro-objects**

Putong Kang,<sup>a,1</sup> Zhenhua Tian,<sup>b,1</sup> Shujie Yang,<sup>a,1</sup> Wenzhuo Yu,<sup>a</sup> Haodong Zhu,<sup>a</sup> Hunter Bachman,<sup>a</sup> Shuaiguo Zhao,<sup>a</sup> Peiran Zhang,<sup>a</sup> Zeyu Wang,<sup>a</sup> Ruoyu Zhong,<sup>a</sup> and Tony Jun Huang<sup>a,\*</sup>

a. Department of Mechanical Engineering and Materials Science, Duke University, Durham, NC 27708, USA.

b. Department of Aerospace Engineering, Mississippi State University, Starkville, MS 39762, USA.

<sup>1</sup> These authors contributed equally to this work.

\*Corresponding author. Email: tony.huang@duke.edu

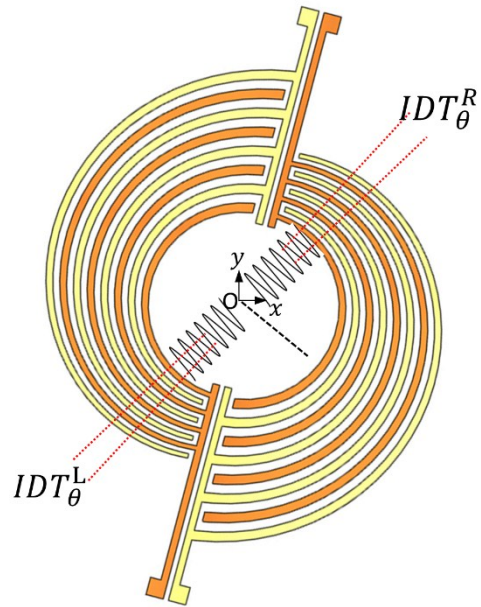

**Figure S1.** Schematic of acoustic tweezers composed of a pair of CSFITs for illustrating the case that angular sections in a pair are excited using an input signal with one frequency component.

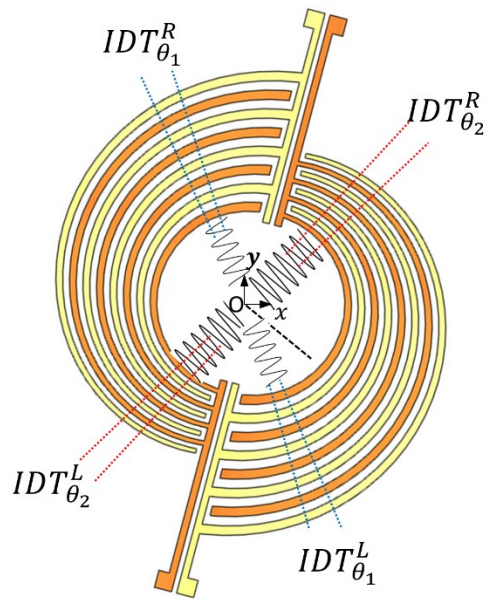

**Figure S2.** Schematic of acoustic tweezers composed of a pair of CSFITs for illustrating the case when angular sections in two pairs are excited using an input signal with two frequency components.

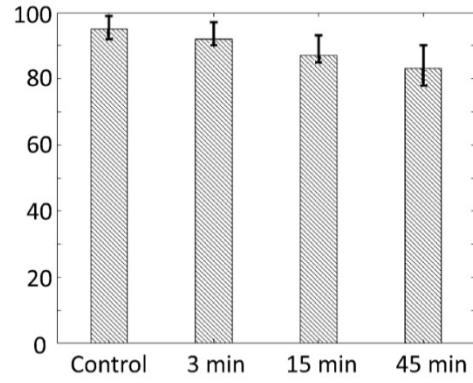

**Figure S3.** Viabilities of K562 cells for the control group without any SAWs and three test groups with different exposure durations (3, 15, and 45 mins) of SAWs.

## Section S1. The configuration of acoustic tweezers based on CSFITs

Figure S1 shows a schematic of the acoustic tweezers based on circular slanted-finger interdigital transducers (CSFITs). The device is composed of a pair of CSFITs that are in a centrosymmetric distribution with respect to the origin  $O$ . We can define an infinitesimal element in the  $\theta$  direction and its couple in the  $\theta + \pi$  direction and denote them as the  $\theta^{th}$  pair, as illustrated by the area between dotted lines in Figure S1. The two angular sections are denoted as  $IDT_{\theta}^L$  and  $IDT_{\theta}^R$ . These two sections have the same finger spacing  $d_{\theta}$  and the same width  $d_{\theta}$  of electrodes. Hence, they have the same resonate frequency  $f_{\theta} = \frac{c_{\theta}}{4d_{\theta}}$ , where  $c_{\theta}$  is the phase velocity. Coordinates of tangent points on the inner edges of inner electrodes are denoted as  $x_{\theta}^L$  and  $x_{\theta}^R$ . Considering the centrosymmetric distribution of CSFITs, we can find that  $x_{\theta}^L = -x_{\theta}^R$ .

## Section S2. Material properties

The material properties of LiNbO<sub>3</sub> wafers for simulations are

$$[\varepsilon] = \begin{bmatrix} 43.6 & 0 & 0 \\ Sym & 43.6 & 0 \\ & & 29.16 \end{bmatrix}$$

$$[e] = \begin{bmatrix} 0 & 0 & 0 & 0 & 3.69 & -2.53 \\ -2.54 & 2.54 & 0 & 3.69 & 0 & 0 \\ 0.19 & 0.19 & 1.31 & 0 & 0 & 0 \end{bmatrix} C/m^2$$

$$[c] = \begin{bmatrix} 202.90 & 52.92 & 74.91 & 9.00 & 0 & 0 \\ 52.92 & 202.90 & 74.91 & -9.00 & 0 & 0 \\ 74.91 & 74.91 & 243.08 & 0 & 0 & 0 \\ 9.00 & -9.00 & 0 & 59.90 & 0 & 0 \\ 0 & 0 & 0 & 0 & 59.90 & 8.99 \\ 0 & 0 & 0 & 0 & 8.99 & 74.88 \end{bmatrix} \times 10^9 Pa$$

Where  $[\varepsilon]$  is the relative permittivity matrix,  $[e]$  is the piezoelectric coupling matrix, and  $[c]$  is the elasticity matrix. The density of the LiNbO<sub>3</sub> substrate is 4700 kg/m<sup>3</sup>.

**Movie S1. Dynamic process of aligning K562 cells using CSFIT based acoustic tweezers.**

**Movie S2. Transformation of particle patterns by switching the excitation frequencies in CSFIT based acoustic tweezers.**

**Movie S3. Translation of particle patterns through phase modulation in CSFIT based acoustic tweezers.**

**Movie S4. Translation of single microparticles along complex paths in CSFIT based acoustic tweezers.**
